# Supplementary material
Source: PubMed Central journal article supplement (PMC3549103)
Supplement: 1220875110_pnas.201220875SI.pdf [file 1220875110_pnas.201220875SI.pdf]

# Supporting Information

de Carvalho Myskiw et al. 10.1073/pnas.1220875110

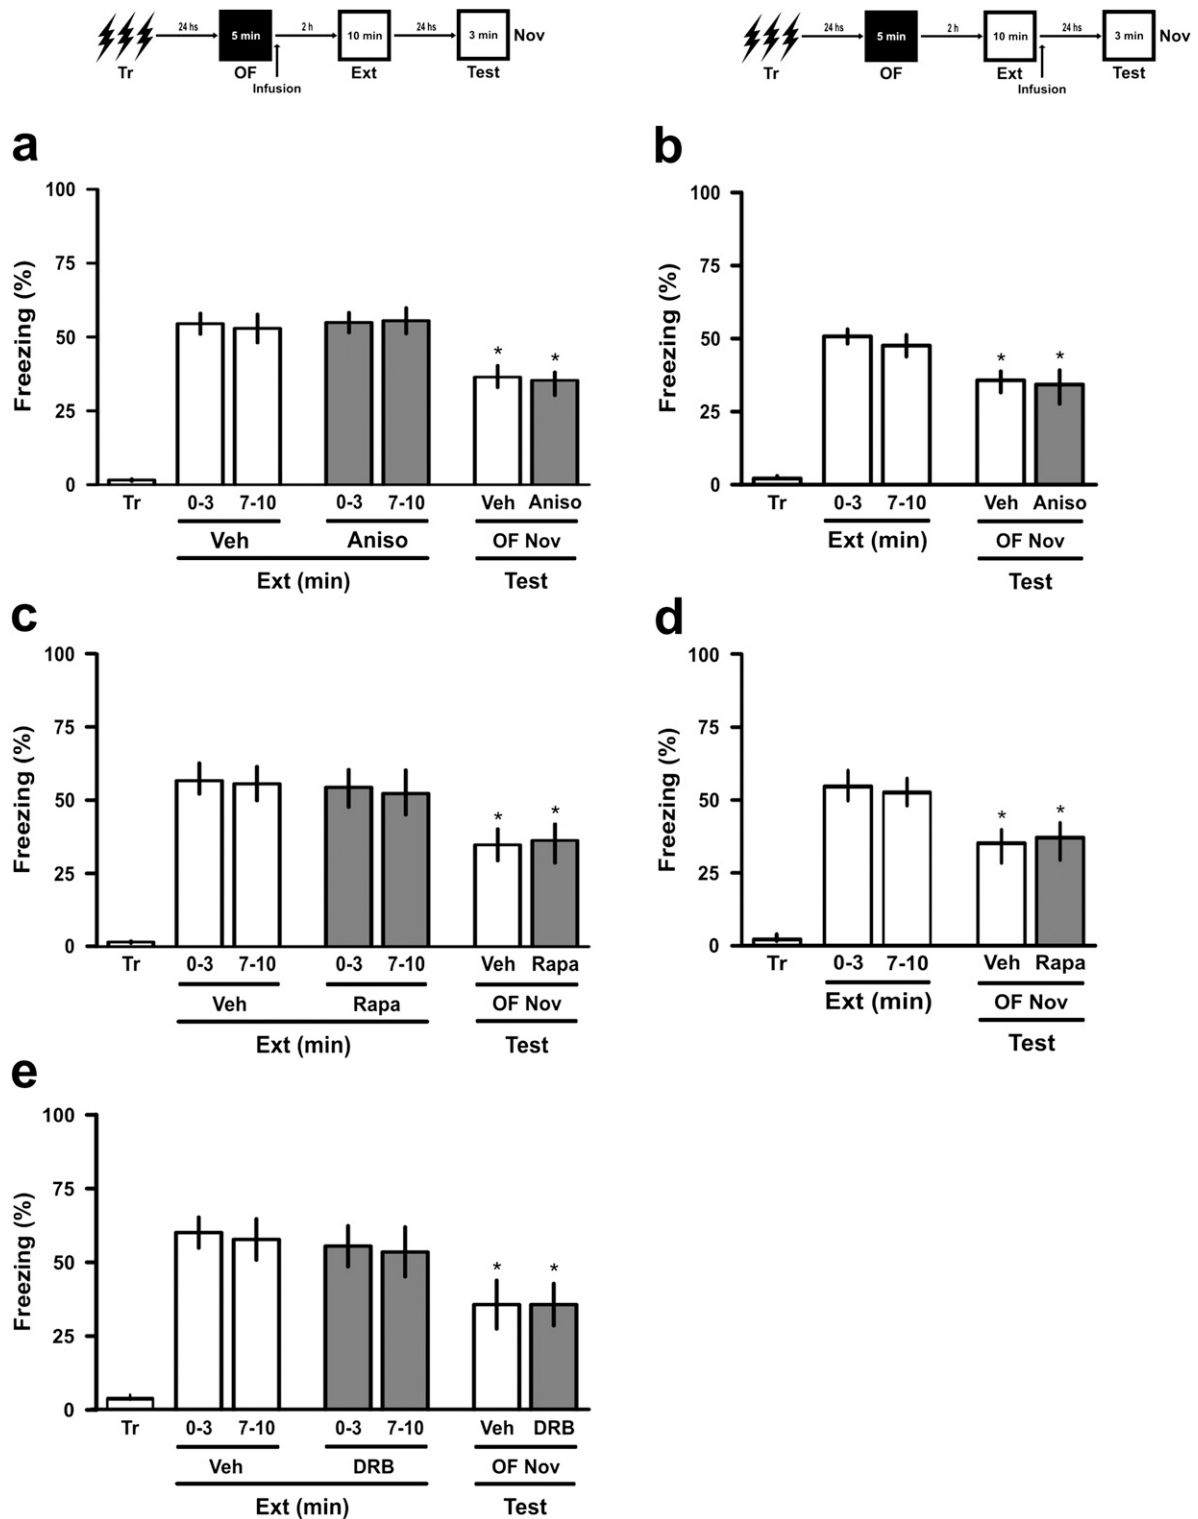

**Fig. S1.** Inhibition of protein synthesis in the basolateral complex of the amygdala (BLA) does not preclude the benefit of contextual novelty. (A and B) Rats with infusion cannulae implanted in the BLA were trained in a contextual fear conditioning (CFC) task. After 24 h, they received intra-BLA infusions of either

Legend continued on following page

vehicle (Veh) or anisomycin (Aniso; 80  $\mu$ g per side) immediately after a 5-min exposure to a novel (Nov) open field (OF) (A) or immediately after a weak extinction training session (B). After another 24 h, the animals were subjected to a 3-min retention test. \* $P < 0.05$  vs. the last 3 min of extinction training session, Newman–Keuls test after one-way ANOVA. (C and D) Rats with infusion cannulae implanted in the BLA were trained in a CFC task. After 24 h, they received intra-BLA infusions of either vehicle or rapamycin (Rapa; 5  $\mu$ g per side) immediately after a 5-min exposure to a novel OF (C) or immediately after a weak extinction training session (D). After another 24 h, the animals were subjected to a 3-min retention test. \* $P < 0.05$  vs. the last 3 min of the extinction training session, Newman–Keuls test after one-way ANOVA. (E) Rats with infusion cannulae implanted in the BLA were trained in a CFC task. After 24 h, they received intra-BLA infusions of either vehicle or 5,6-dichloro-1-beta-D-ribofuranosylbenzimidazole DRB (8 ng per side) immediately after a novel OF, 2 h after they were subjected to a weak extinction training session. After another 24 h, the animals were subjected to a 3-min retention test. \* $P < 0.05$  vs. the last 3 min of the extinction training session, Newman–Keuls test after one-way ANOVA. Data are presented as mean  $\pm$  SEM of the percentage of time spent freezing.  $n = 11$  or 12 animals per group. (Upper) Schematic representation of the behavioral protocol used.
